# Supplementary material for: Sensitive detection of dengue virus NS1 by highly stable affibody-functionalized gold nanoparticles
Source: Royal Society of Chemistry journal article supplement (doi:10.1039/c8nj02244e), 2018-01-01
Supplement: c8nj02244e1.pdf [file c8nj02244e1.pdf]

## Supplementary Information

### **Sensitive detection of dengue virus NS1 by highly stable affibody-functionalized gold nanoparticles**

Jinho Bang<sup>ab</sup>, Heesun Park<sup>a</sup>, Won Il Choi<sup>a</sup>, Daekyung Sung<sup>a</sup>, Jin Hyung Lee<sup>a</sup>, Kuen

Yong Lee<sup>b</sup>, Sunghyun Kim<sup>\*a</sup>

<sup>a</sup> Korea Institute of Ceramic Engineering and Technology, Center for Convergence  
Bioceramic Materials, 202 Osongsaengmyeong 1-ro, Cheongjusi, Chungcheongbuk-do,  
South Korea

<sup>b</sup> Department of Bioengineering, Hanyang University, Seoul, 133-791, South Korea

\*Correspondence:

Tel: +82-43-913-1512; Fax: +82-43-913-1598; E-mail: shkim0519@kiect.re.kr (S. Kim)

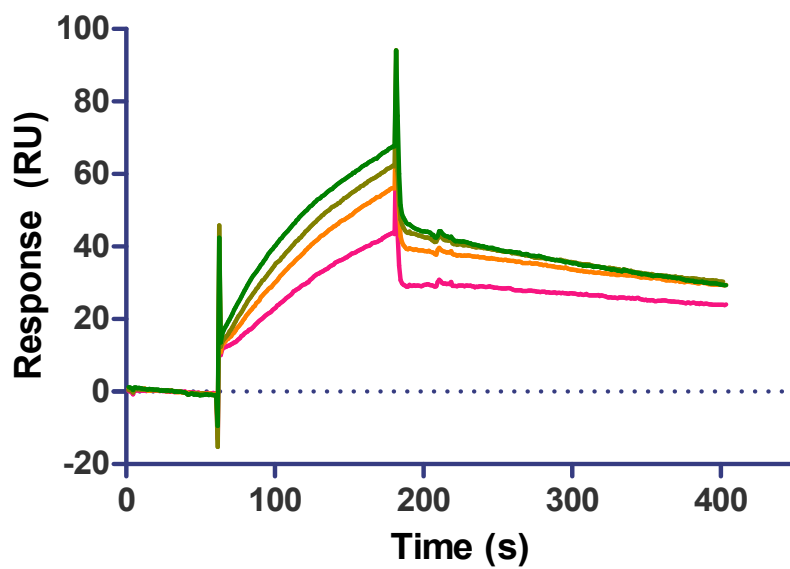

**Figure S1.** Affinity analysis of Z<sub>NS1</sub>16. Different concentrations of Z<sub>NS1</sub>16 (2, 3, 4, and 5 μM) were applied to an NS1-immobilized chip.

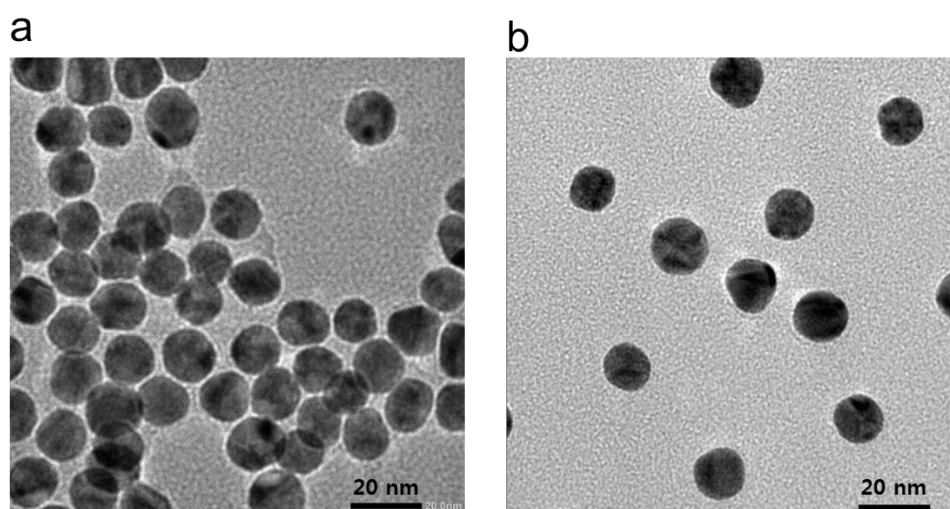

**Figure S2.** Transmission electron microscopy (TEM) analysis of (a) AuNPs and (b)  $(Z_{NSI}12)_2$ -AuNPs.

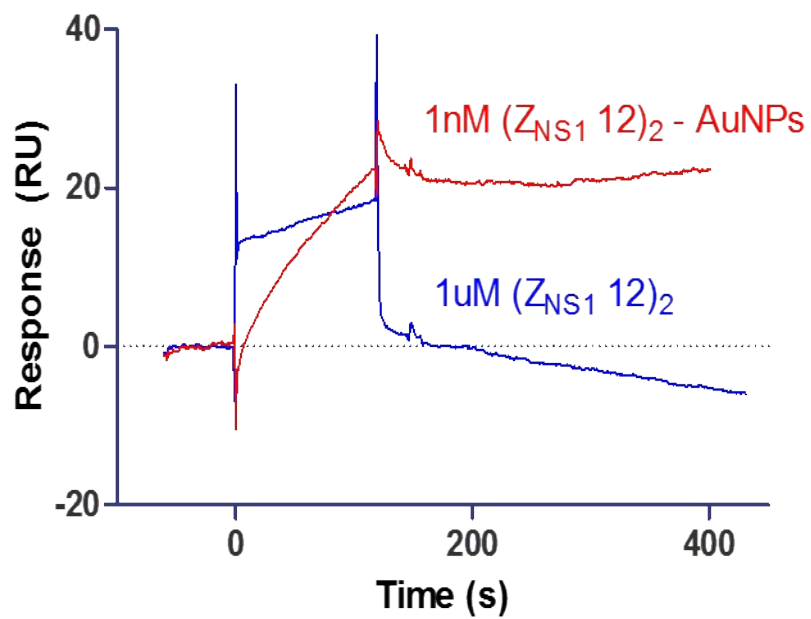

**Figure S3.** Binding ability comparison of 1  $\mu\text{M}$   $(\text{Z}_{\text{NS}1}12)_2$  and 1 nM  $(\text{Z}_{\text{NS}1}12)_2$ -AuNPs using surface resonance plasmon (SPR) analysis.
